# Supplementary material for: g-C3N4@TiO2 photoanodes for high-efficiency QDSSCs: improved electron transfer and photochemical stability
Source: Royal Society of Chemistry journal article supplement (doi:10.1039/d4dt00621f), 2024-01-01
Supplement: d4dt00621f1.pdf [file d4dt00621f1.pdf]

## Supplementary information

### g-C<sub>3</sub>N<sub>4</sub>@TiO<sub>2</sub> photoanodes for high-efficiency QDSSCs: improved electron transfer and photochemical stability

Quanhang Li, Tingting Zhang, Donghui Cui, and Fengyan Li\*

Key Laboratory of Polyoxometalate and Reticular Material Chemistry of Ministry of Education, College of Chemistry, Northeast Normal University, Changchun 130024, P. R. China.

\*Corresponding authors.

E-mail addresses: [lify525@nenu.edu.cn](mailto:lify525@nenu.edu.cn).

**Table. S1.** Comparisons of present photovoltaic values in this study with other reports of similar Photoanode

| Photoanode                            | PCE % | Jsc (mA/cm <sup>2</sup> ) | Voc (V) | FF   | Year | Ref |
|---------------------------------------|-------|---------------------------|---------|------|------|-----|
| TiO <sub>2</sub> film                 | 6.1   | 14.8                      | 0.628   | 0.54 | 2023 | 1   |
| TiO <sub>2</sub> nanoparticle/nanorod | 4.42  | 15.48                     | 0.623   | 0.46 | 2017 | 2   |
| TiO <sub>2</sub> film                 | 6.7   | 22.93                     | 0.559   | 0.52 | 2021 | 3   |
| TiO <sub>2</sub> @MWCNT               | 6.3   | 18.00                     | 0.63    | 0.56 | 2024 | 4   |
| TiO <sub>2</sub> film                 | 5.7   | 18.31                     | 0.576   | 0.54 | 2023 | 5   |

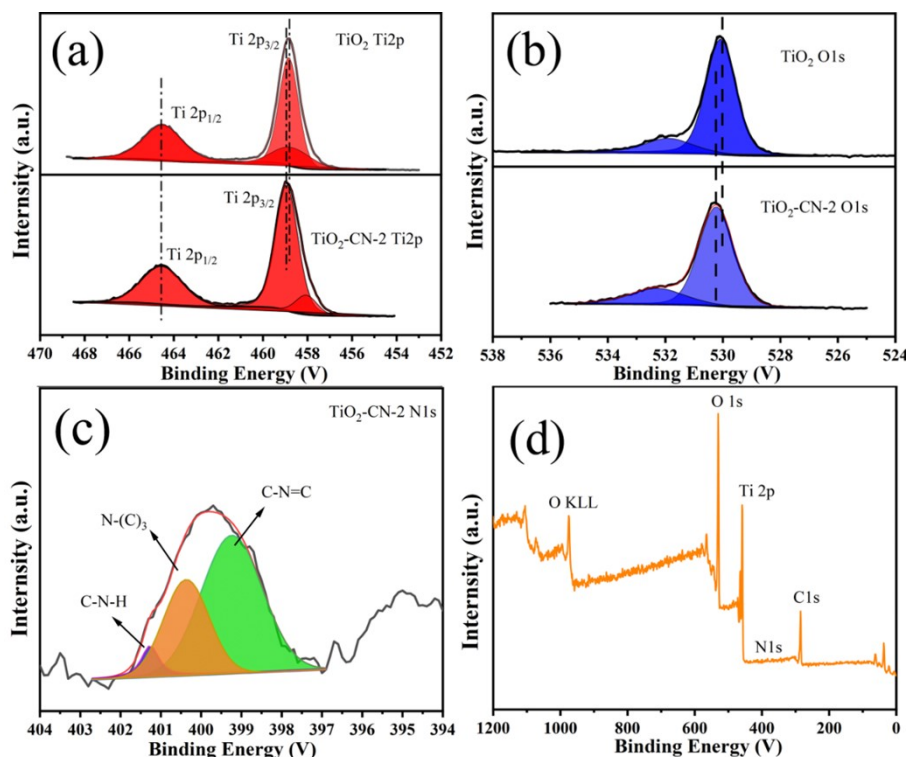

**Fig.S1** High-resolution XPS spectra of (a) TiO<sub>2</sub> and TiO<sub>2</sub>-CN-2, (b) O 1s of TiO<sub>2</sub> and TiO<sub>2</sub>-CN-2, (c) N 1s of TiO<sub>2</sub>-CN-2, and (d) high-resolution XPS spectra of TiO<sub>2</sub>-CN-2

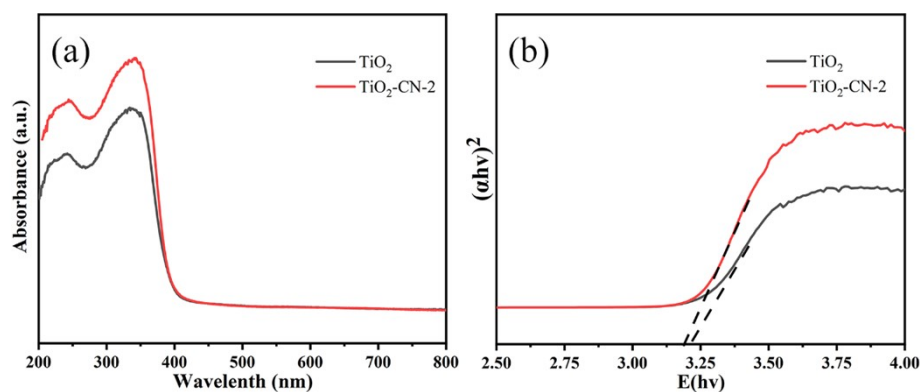

Fig.S2 UV-Vis diagram of (a)TiO<sub>2</sub> and (b)TiO<sub>2</sub>-CN-2; Band gap diagram of (b)TiO<sub>2</sub> and (b)TiO<sub>2</sub>-CN-2

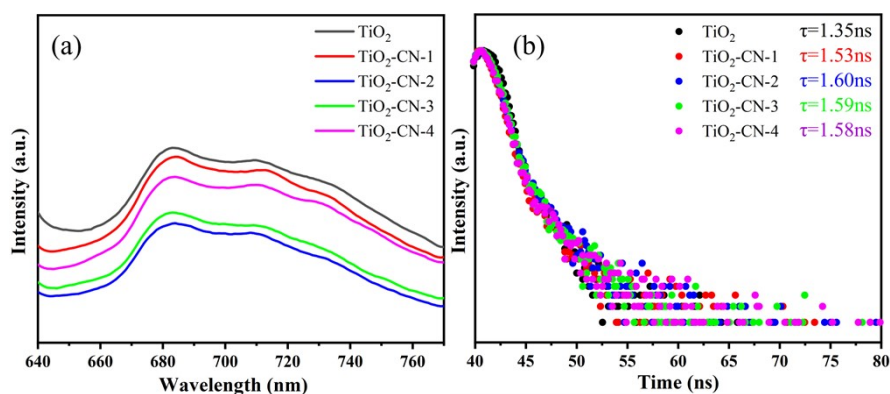

Fig.S3 (a)PL spectrum and (b)Time-resolved PL spectrum of TiO<sub>2</sub>, TiO<sub>2</sub>-CN-1, TiO<sub>2</sub>-CN-2, TiO<sub>2</sub>-CN-3 and TiO<sub>2</sub>-CN-4

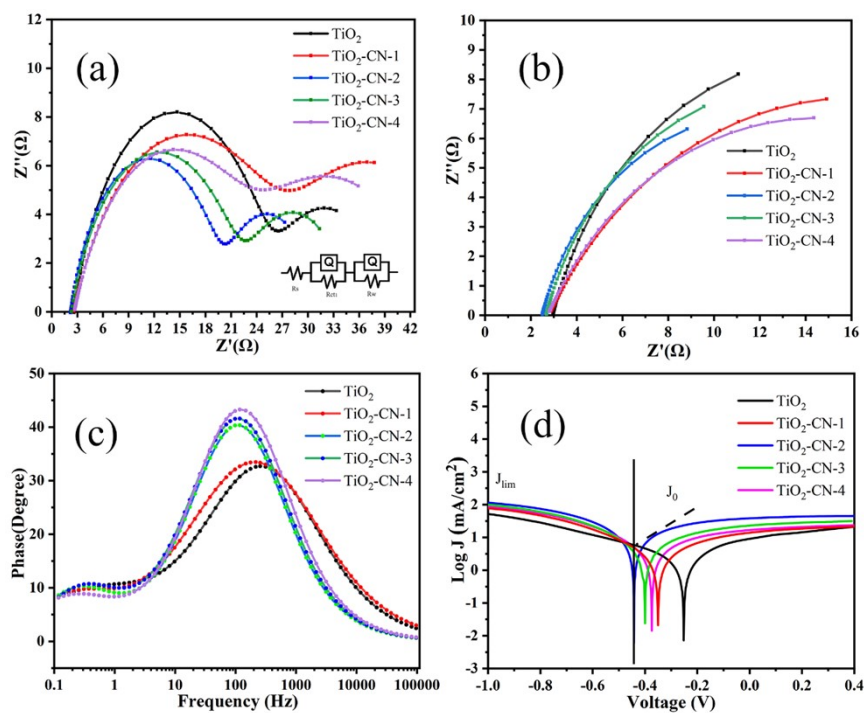

Fig. S4 QDSSCs corresponding to different optical anodes are (a) Nyquist curves, (b) partial amplification of Nyquist curves, (c)Bode phase curves, and (d) Tafel curves

**Table.S2** EIS and other performance parameters of QDSSCs corresponding to different optical anodes

| Photoanode material    | $R_s$ ( $\Omega$ ) | $R_{ct}$ ( $\Omega$ ) | $J_0$ (mA/cm <sup>2</sup> ) | $\tau_e$ (ms) |
|------------------------|--------------------|-----------------------|-----------------------------|---------------|
| TiO <sub>2</sub>       | 3.1                | 23.23                 | 1.2                         | 10.4          |
| TiO <sub>2</sub> -CN-1 | 2.9                | 22.88                 | 3.1                         | 9.2           |
| TiO <sub>2</sub> -CN-2 | 2.5                | 18.14                 | 5.0                         | 7.2           |
| TiO <sub>2</sub> -CN-3 | 2.7                | 20.70                 | 3.7                         | 7.5           |
| TiO <sub>2</sub> -CN-4 | 2.8                | 22.12                 | 3.1                         | 8.1           |

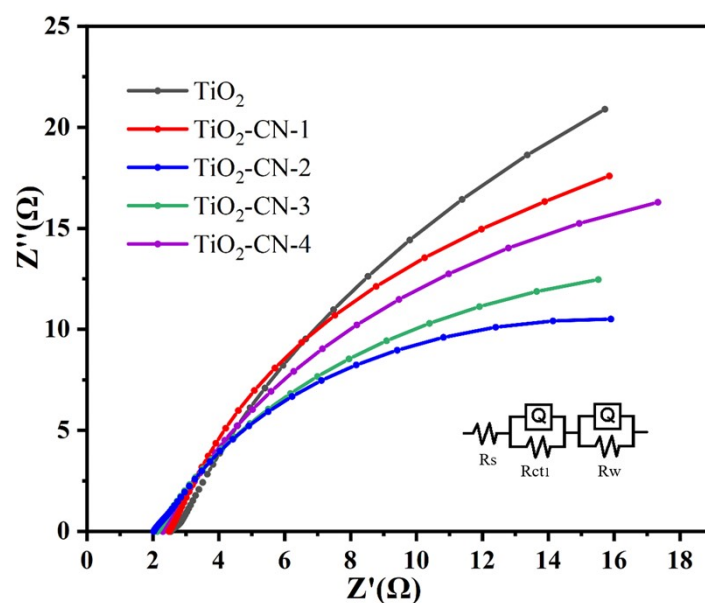**Fig. S5** Nyquist curve of QDSSCs in each group under dark condition**Table.S3** EIS data of QDSSCs in each group under dark condition

| Photoanode material    | $R_s$ ( $\Omega$ ) | $R_{ct}$ ( $\Omega$ ) |
|------------------------|--------------------|-----------------------|
| TiO <sub>2</sub>       | 2.73               | 46.46                 |
| TiO <sub>2</sub> -CN-1 | 2.54               | 45.68                 |
| TiO <sub>2</sub> -CN-2 | 2.06               | 39.28                 |
| TiO <sub>2</sub> -CN-3 | 2.15               | 42.40                 |
| TiO <sub>2</sub> -CN-4 | 2.33               | 44.31                 |

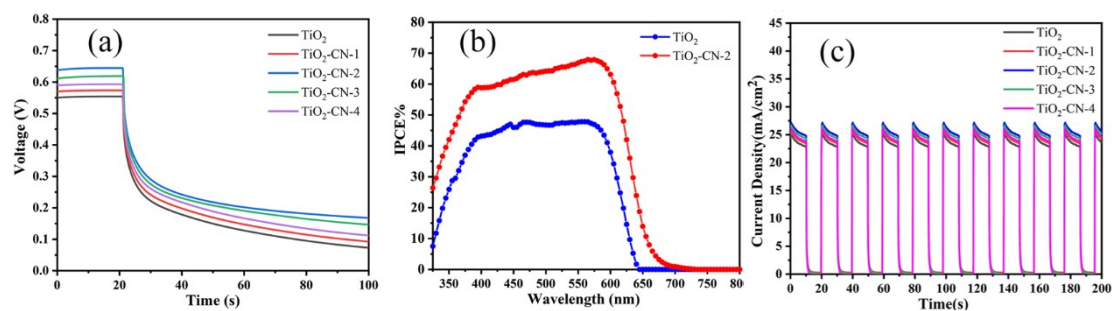

Fig. S6 (a) OCVD curves, (b) IPCE curves, and (c) photocurrent response curves of each group of cells

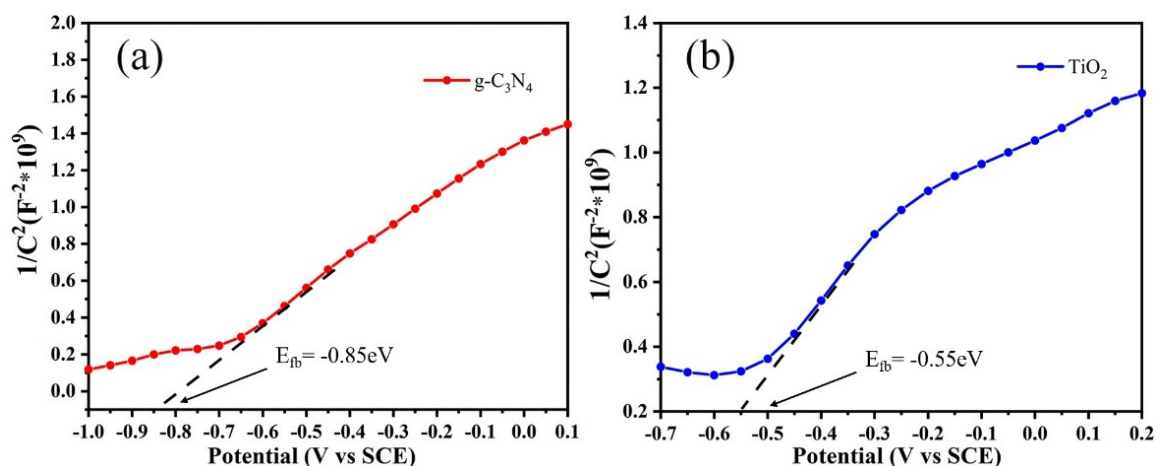

Fig. S7 Mott-Schottky plots of (a)  $g\text{-C}_3\text{N}_4$  and (b)  $\text{TiO}_2$

- 1 Y. Jiang, Y. Dai, X. Xie, Q. Wang and J. Dai, *ACS Applied Nano Materials*, 2023, **6**, 17572-17580.
- 2 Q. Gao, X. Zhang, L. Duan, X. Li, X. Li, Y. Yang, Q. Yu and W. Lü, *Journal of Alloys and Compounds*, 2017, **715**, 337-343.
- 3 S. Liu, R. Fan, Y. Zhao, M. Yu, Y. Fu, L. Li, Q. Li, B. Liang and W. Zhang, *Materials Today Energy*, 2021, **21**, 100798-100804.
- 4 Y. Jiang, Y. Dai, X. Xie, Q. Wang and J. Dai, *ACS Applied Materials & Interfaces*, 2024, **16**, 12062-12072.
- 5 B. B. Jin, X. J. Liu, L. C. Dong, X. X. Zhong, M. Y. Liang, J. Gan, M. Chen and F. Guo, *Solar Energy Materials and Solar Cells*, 2023, **255**, 112293-112301.
